# Supplementary material for: Effects of falls prevention interventions on falls outcomes for hospitalised adults: protocol for a systematic review with meta-analysis
Source: PubMed Central journal article supplement — BMJ Open. 2017 Nov 12;7(11):e017864. doi: 10.1136/bmjopen-2017-017864 (PMC5695509; doi:10.1136/bmjopen-2017-017864), 2017-11-12
Supplement: bmjopen-2017-017864supp001.pdf [file bmjopen-2017-017864supp001.pdf]

## Appendix 1: Example search strategy: MEDLINE (OvidSP)

1. Accidental Falls/
2. (falls or faller\$).tw.
3. or/1-2
4. exp adults/
5. (Adult\$).tw.
6. 6 or/4-5
7. and/3,6 (12226)
8. Acute Care/
9. emergency/
10. Hospitalization/
11. Subacute Care/
12. exp Hospitals/
13. Hospital Units/
14. Rehabilitation Centers/
15. ((long stay or acute or sub-acute or subacute or outpatient or hospital) adj3 (care or ward\$1)).tw.
16. ((rehabilitation or outpatient) adj (ward\$1 or hospital\$1 or unit\$1)).tw.
17. or/8-16
18. and/7,17
19. randomized controlled trial.pt.
20. controlled clinical trial.pt.
21. randomized.ab.
22. placebo.ab.
23. Clinical Trials as Topic/
24. randomly.ab.
25. trial.ab.
26. or/19-25
27. exp Animals/ not Humans/
28. 26 not 27
29. and/18,28

## Appendix 2: Standardized form used to apply criteria for study inclusion

| Inclusion criteria                                                                                                                                                                                                                                                                                                                                                                                                                                                              | Yes            | No |
|---------------------------------------------------------------------------------------------------------------------------------------------------------------------------------------------------------------------------------------------------------------------------------------------------------------------------------------------------------------------------------------------------------------------------------------------------------------------------------|----------------|----|
| <p><i>Study Design</i></p> <ul style="list-style-type: none"> <li>Randomised controlled trials, quasi-randomised trials or controlled clinical trials, published in peer-reviewed journals</li> </ul>                                                                                                                                                                                                                                                                           |                |    |
| <p><i>Population</i></p> <ul style="list-style-type: none"> <li>Hospitalized adults of either sex or hospital staff</li> </ul>                                                                                                                                                                                                                                                                                                                                                  |                |    |
| <p><i>Setting</i></p> <ul style="list-style-type: none"> <li>Hospitals defined as “establishments that are primarily engaged in providing emergency care, inpatient nursing, rehabilitative services, outpatient services and hospital-in-the-home for patients”</li> </ul>                                                                                                                                                                                                     |                |    |
| <p><i>Intervention</i></p> <ul style="list-style-type: none"> <li>Studies that evaluate falls prevention interventions, including <i>but not limited to</i> education (including one-one/group /written/telephone/e-health, carer apps), exercises, functional assistance as a falls prevention strategy, health professional education, medications either withdrawing or delivered for falls prevention or multifactorial combinations of the preceding strategies</li> </ul> |                |    |
| <p><i>Data</i></p> <ul style="list-style-type: none"> <li>Papers are only eligible for inclusion if they report data that enables statistical analysis i.e. point estimates and measures of effect or survival curves e.g. time to first fall</li> </ul>                                                                                                                                                                                                                        |                |    |
| <p><b>Exclusion criteria</b></p> <ul style="list-style-type: none"> <li>Residential care or home settings</li> <li>Papers not published in English</li> <li>Papers that were editorials, expert opinion, letters or commentary</li> </ul>                                                                                                                                                                                                                                       |                |    |
| <b>INCLUDE</b>                                                                                                                                                                                                                                                                                                                                                                                                                                                                  | <b>EXCLUDE</b> |    |
| <ul style="list-style-type: none"> <li><b>To be included papers must be rated as yes for all inclusion criteria and have no exclusion criteria</b></li> <li>Proceed to data extraction and content assessment</li> </ul>                                                                                                                                                                                                                                                        |                |    |
